# Supplementary figures and images for: A synthetic three-color scaffold for monitoring genetic regulation and noise
Source: Springer Nature journal article supplement (doi:10.1186/1754-1611-4-10), 2010-07-21

Figure S1.

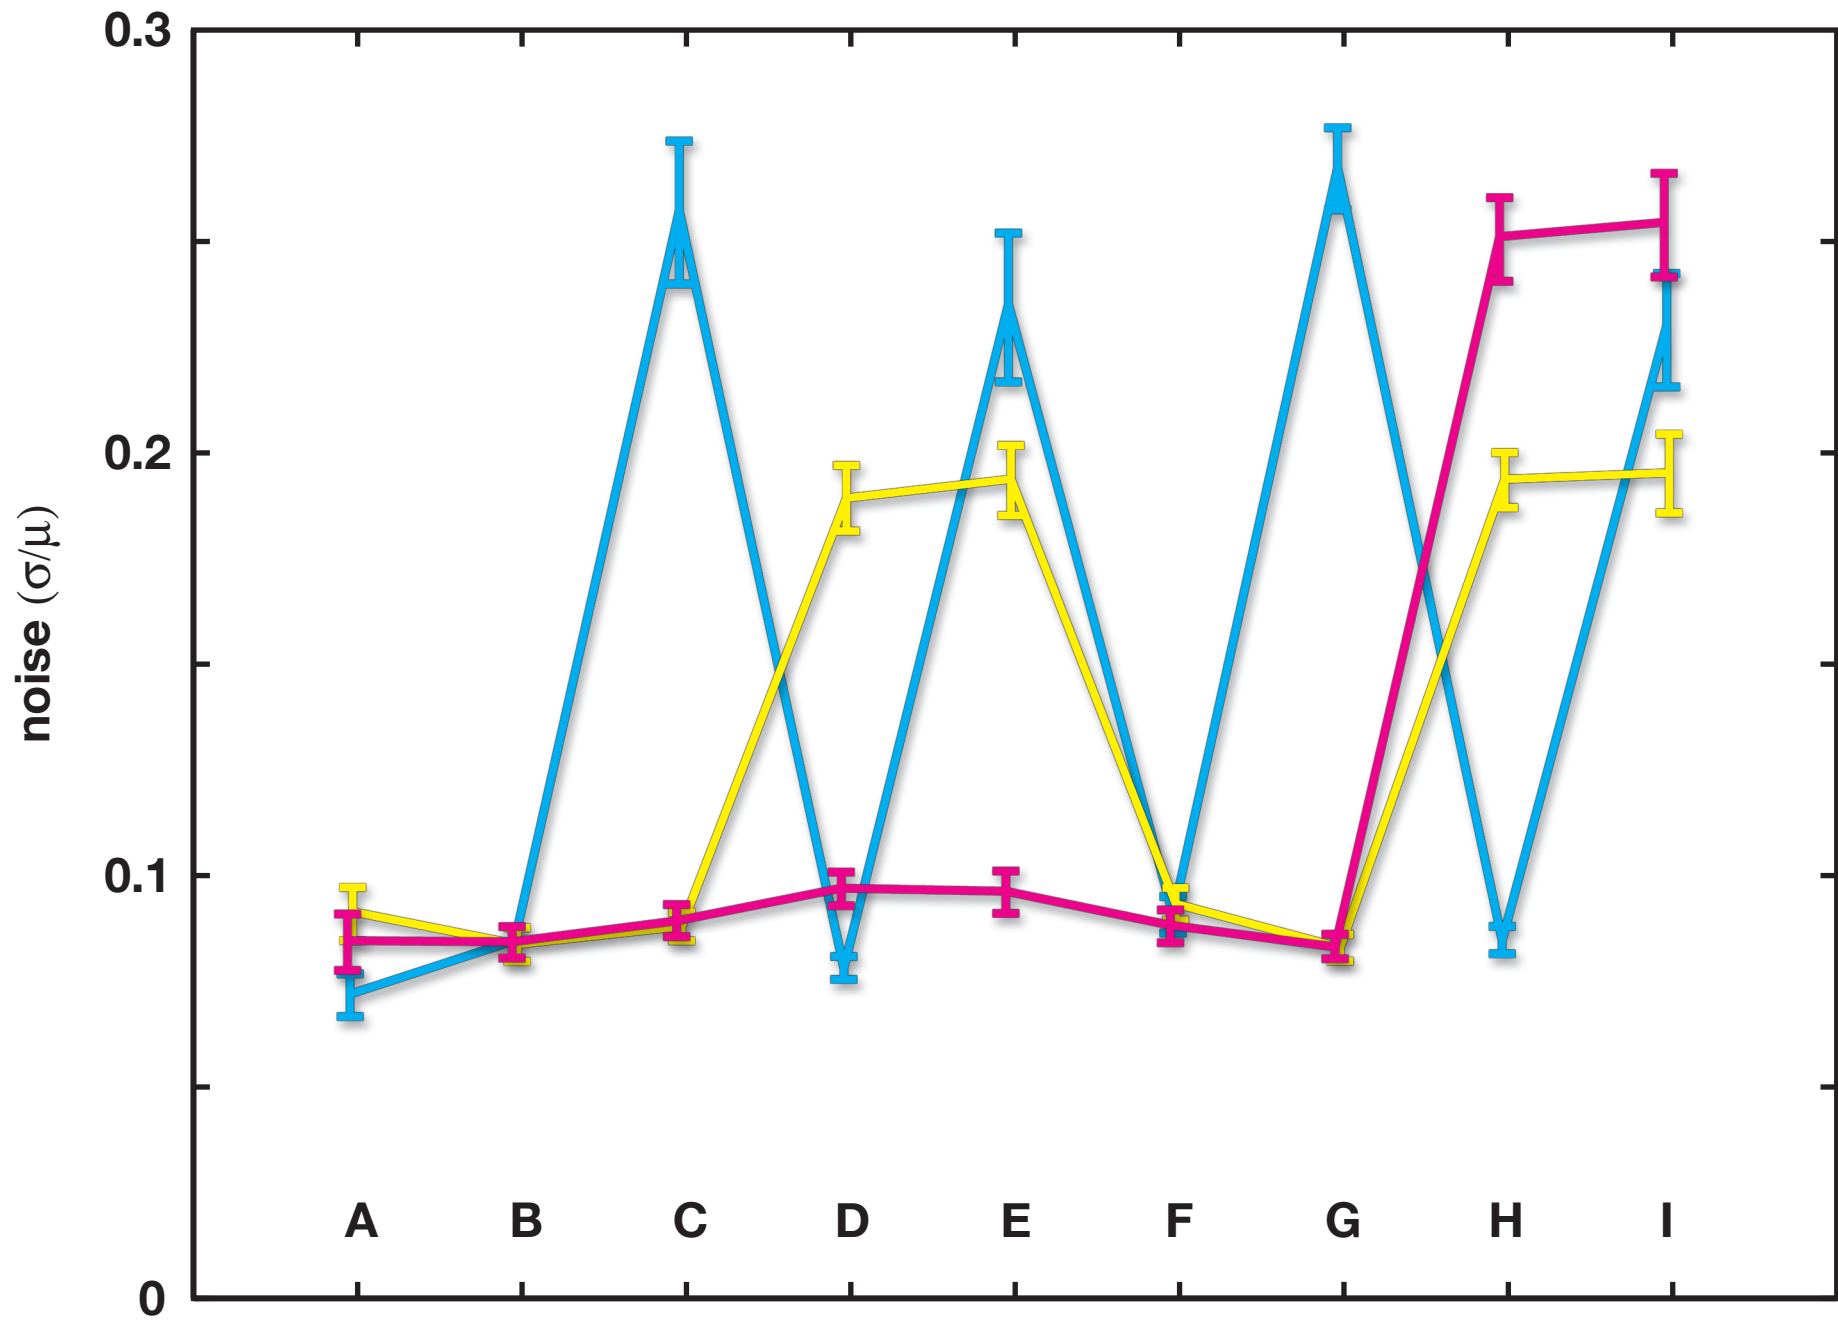

Supplement: Additional file 2 [file 1754-1611-4-10-s2.pdf]
